# Supplementary material for: The Guanidine Pseudoalkaloids 10-Methoxy-Leonurine and Leonurine Act as Competitive Inhibitors of Tyrosinase
Source: PubMed Central journal article supplement (PMC7072302; doi:10.3390/biom10020174), 2020-01-23
Supplement: biomolecules-10-00174-s001.pdf [file biomolecules-10-00174-s001.pdf]

# **The guanidine pseudoalkaloids 10-methoxy-leonurine and leonurine acts as competitive inhibitors of tyrosinase**

Jang Hoon Kim<sup>a,\*\*</sup>, Hyun Hee Leem<sup>b</sup>, Ga Young Lee<sup>c,\*\*</sup>

<sup>a</sup>Research Institute for Basic Sciences, JeJu National University, Jeju 63243, Republic of Korea

<sup>b</sup>National Development Institute of Korean Medicine, Gyeongsan 38573, Republic of Korea

<sup>c</sup>Hepzibah Korea Lnc, Techno 10-ro, Yuseong-gu, Daejeon 34036, Republic of Korea

## **\*\*Corresponding authors**

Tel.:+82-64-754-8308; E-mail address:oasis5325@gmail.com (J.H. Kim).

Tel.:+82-42-935-9944; Fax: +82-42-935-9955; E-mail address:gylee6409@gmail.com (G.Y. Lee).

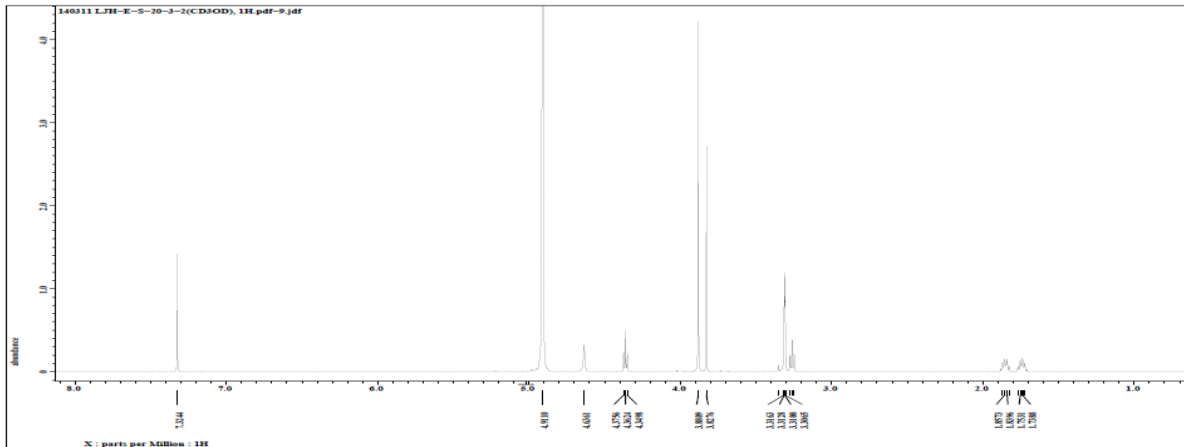

Figure S1.  $^1\text{H}$  NMR spectrum of compound 1. (methanol- $d_4$ , 400 MHz)

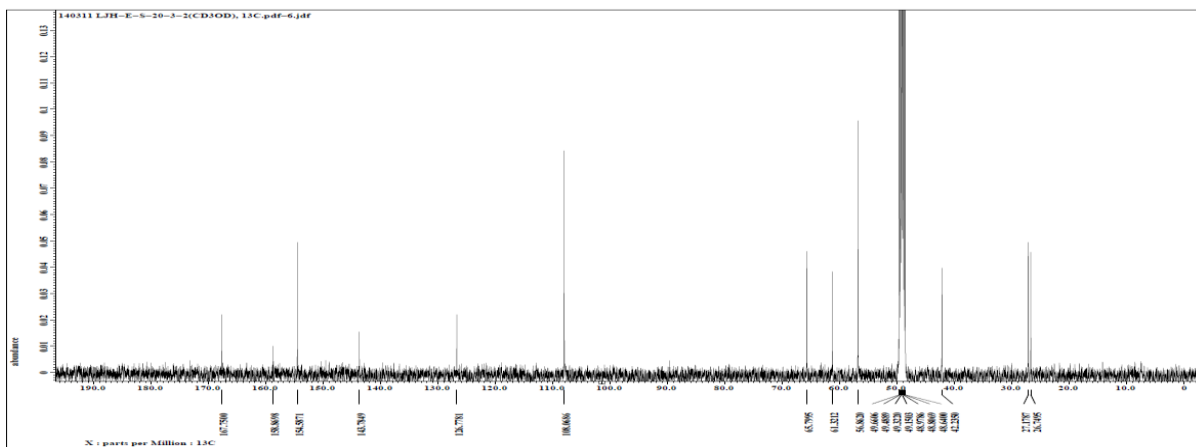

Figure S2.  $^{13}\text{C}$  NMR spectrum of compound 1. (methanol- $d_4$ , 100 MHz)

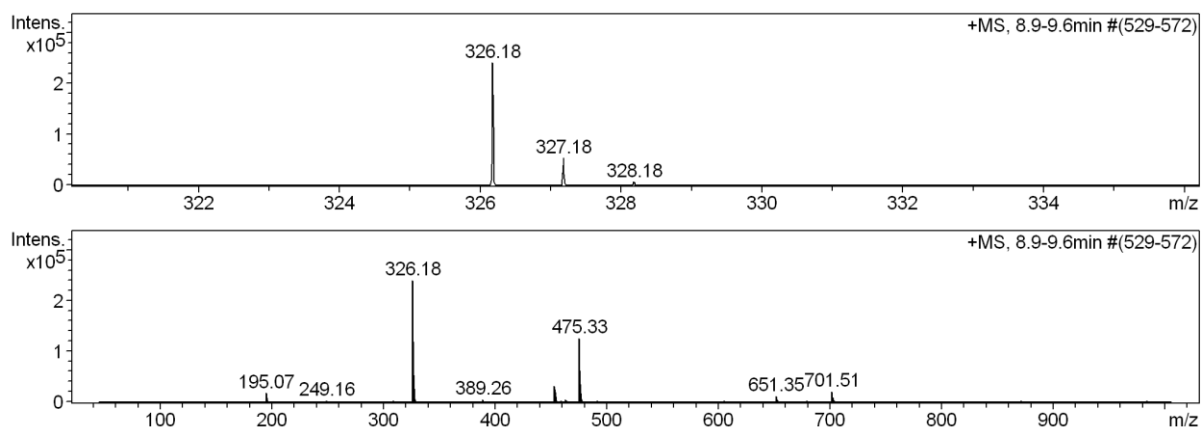

Figure S3. ESI-MS spectrum of compound 1.

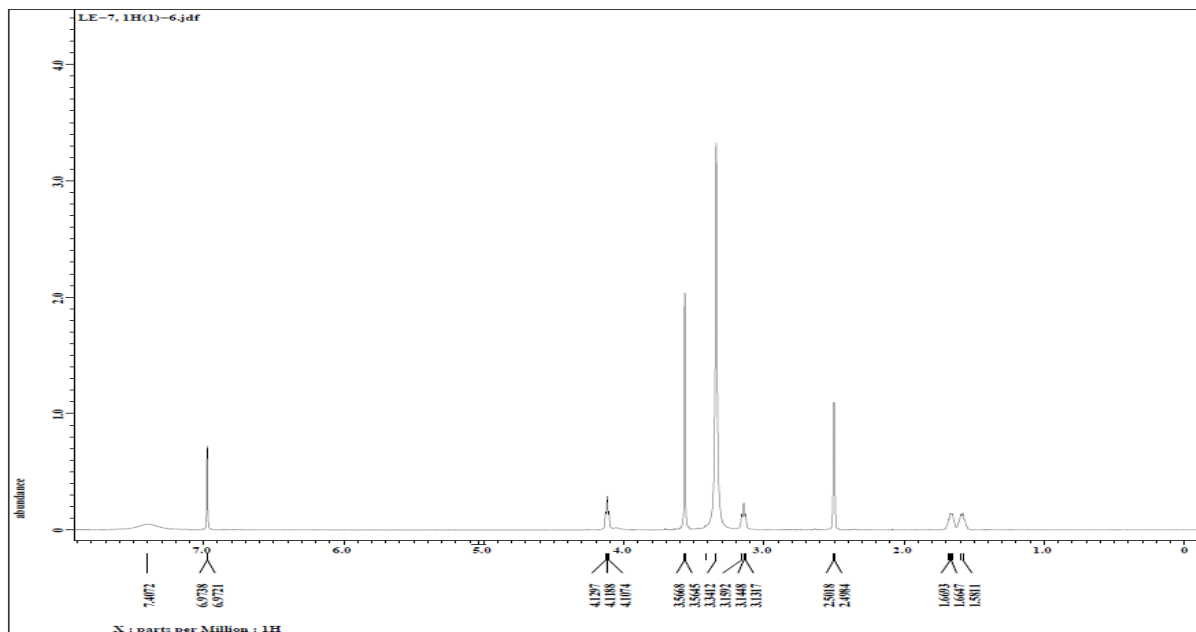

**Figure S4.**  $^1\text{H}$  NMR spectrum of compound 2 (DMSO- $d_6$ , 300 MHz).

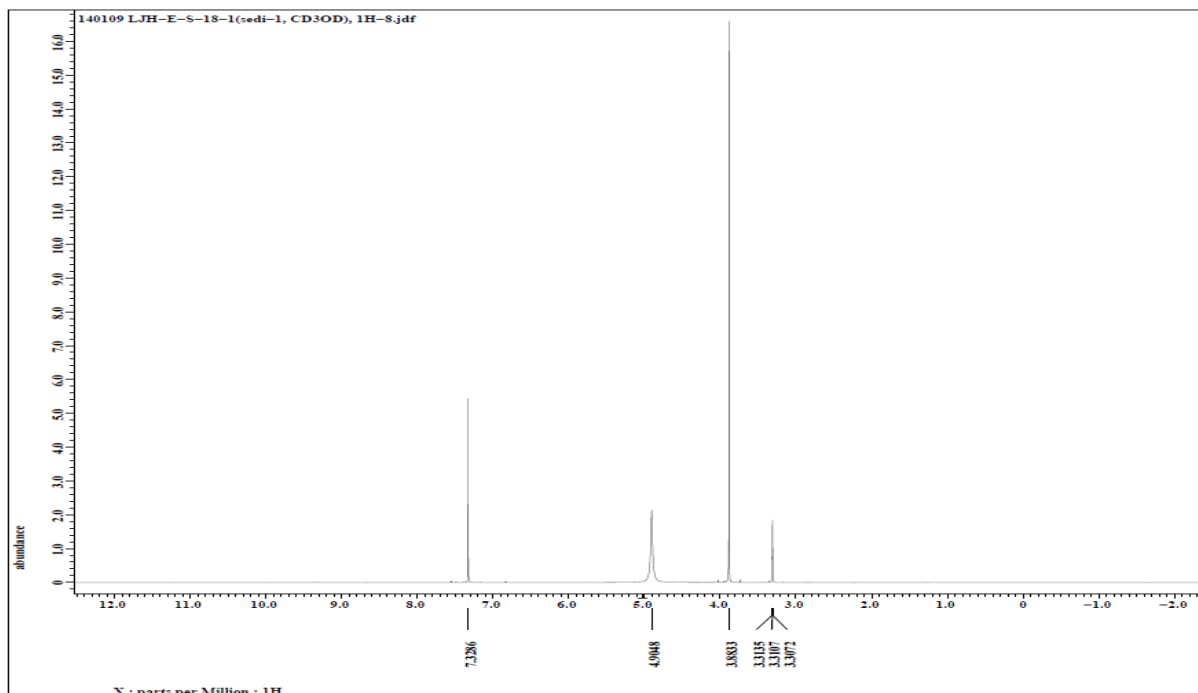

Figure S5.  $^1\text{H}$  NMR spectrum of compound 3 ( $\text{CD}_3\text{OD}$ , 500 MHz).

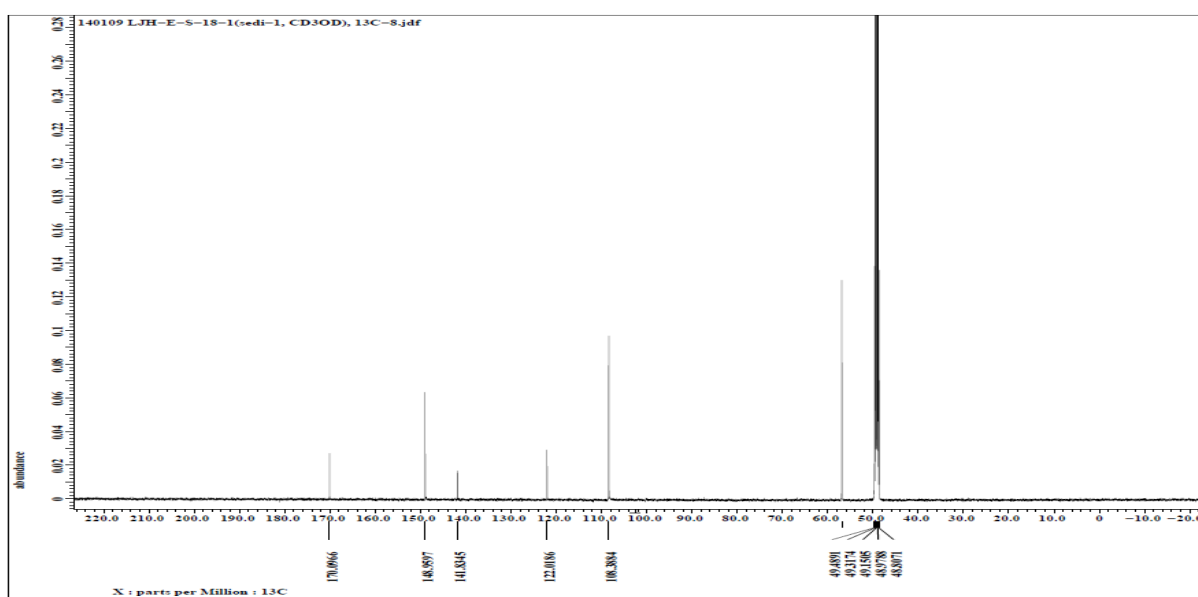

Figure S6.  $^{13}\text{C}$  NMR spectrum of compound 3 ( $\text{CD}_3\text{OD}$ , 125 MHz).

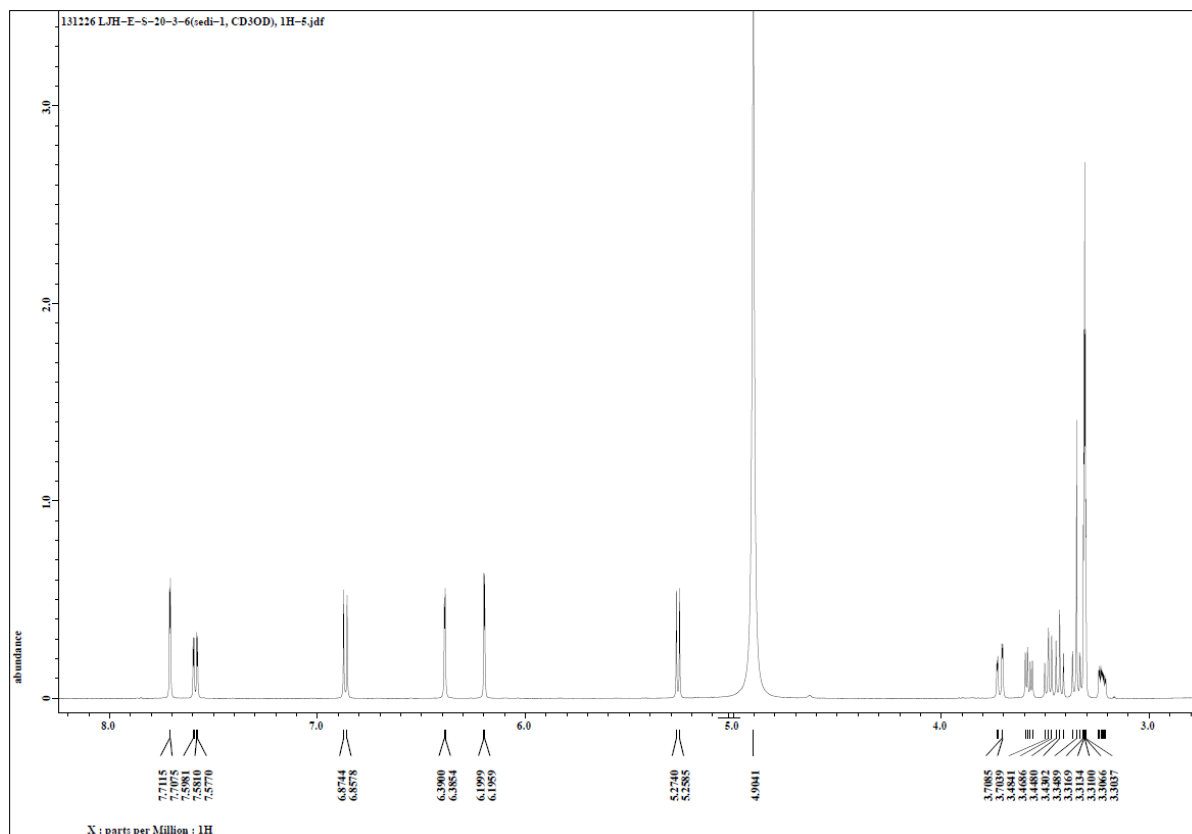

Figure S7.  $^1\text{H}$  NMR spectrum of compound 4 ( $\text{CD}_3\text{OD}$ , 500 MHz).

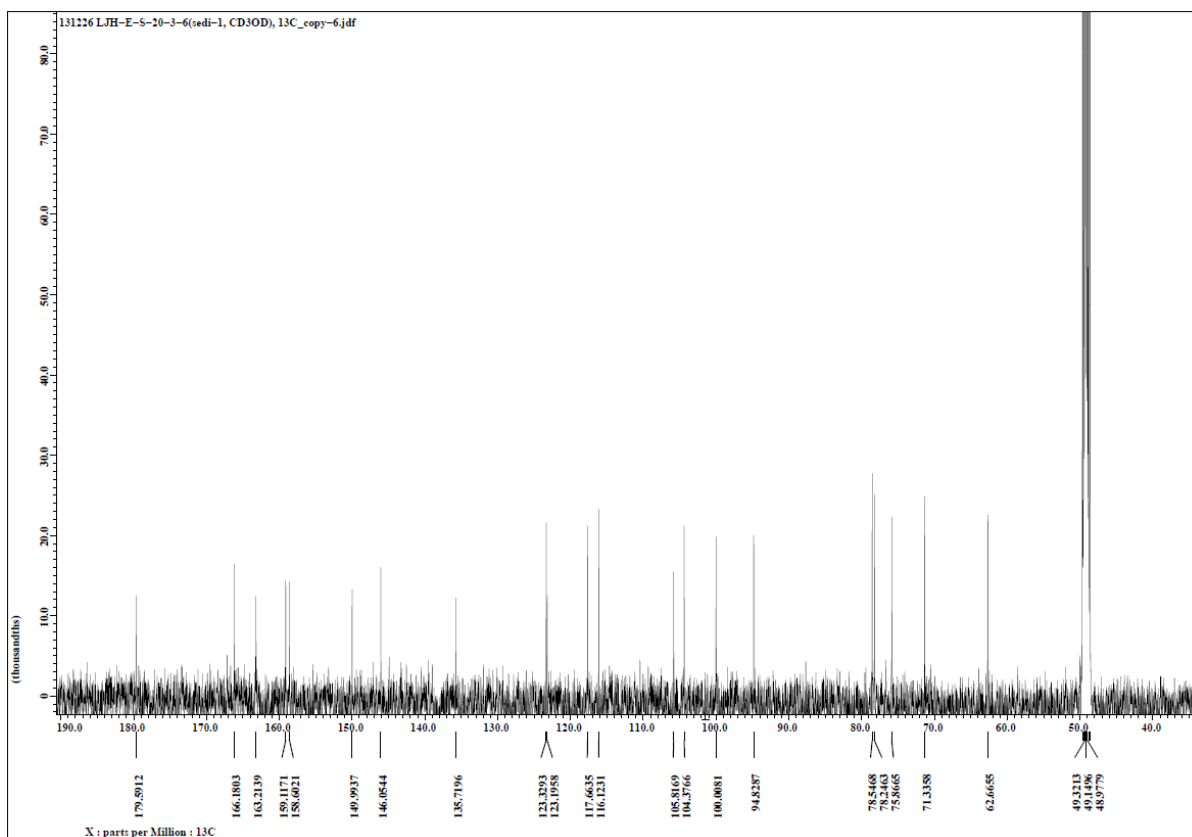

Figure S8.  $^{13}\text{C}$  NMR spectrum of compound 4 ( $\text{CD}_3\text{OD}$ , 125 MHz).

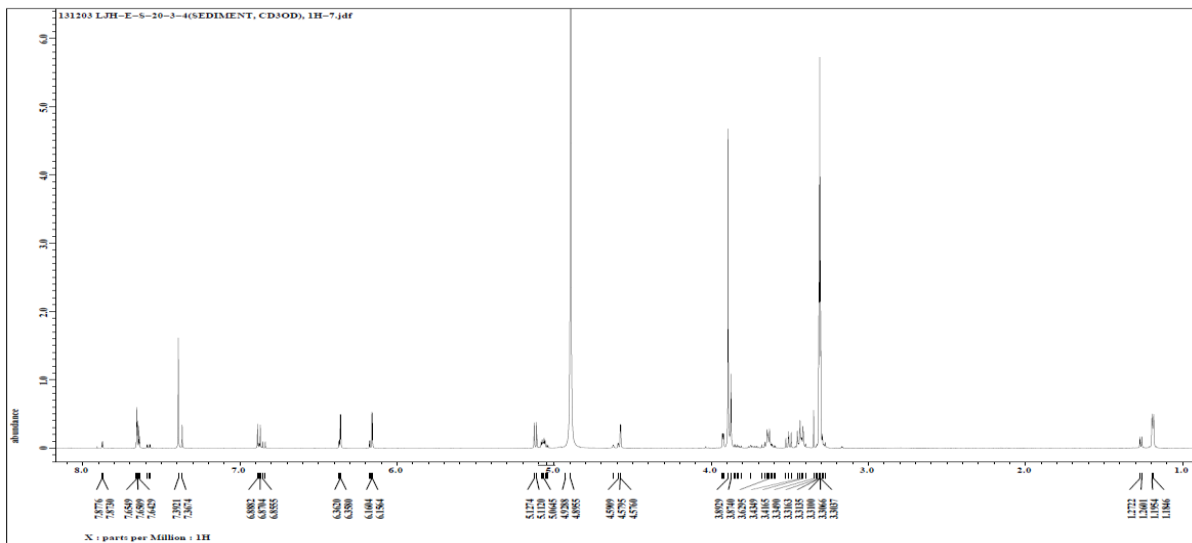

Figure S9.  $^1\text{H}$  NMR spectrum of compound 5 ( $\text{CD}_3\text{OD}$ , 500 MHz).

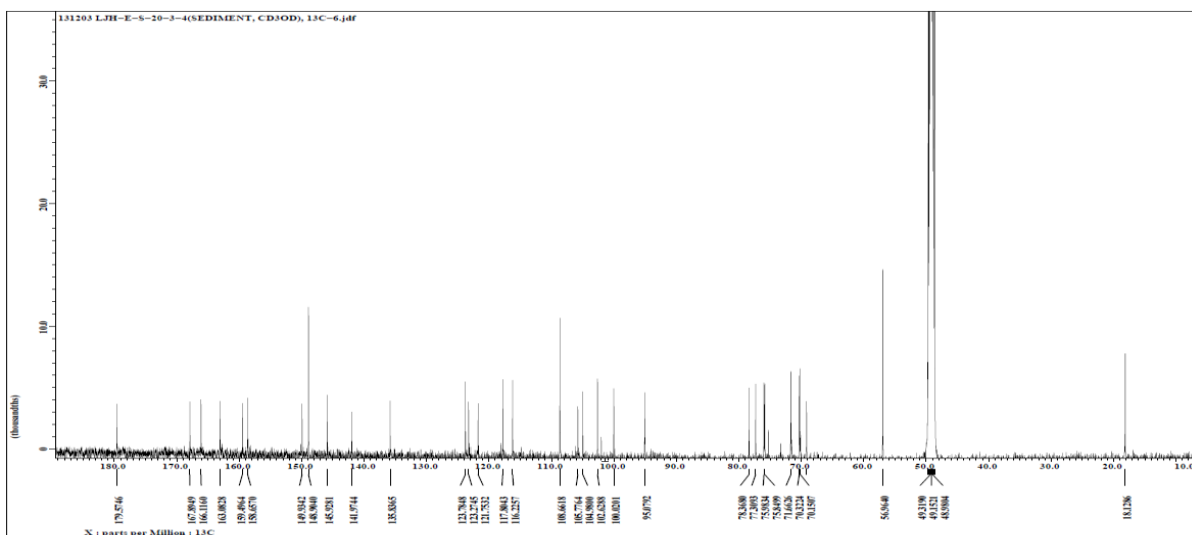

Figure S10.  $^{13}\text{C}$  NMR spectrum of compound 5 ( $\text{CD}_3\text{OD}$ , 125 MHz).
